# Supplementary material for: Climate Change and Reproductive, Maternal, and Child Health Outcomes in Tanzania: Evidence from a Qualitative Study in Kilwa District, Lindi Region
Source: Research Square preprint supplement (doi:10.21203/rs.3.rs-6322837/v1), 2025-04-10
Supplement: Supplementary file [file 8d0b004b1a0e4a198b756121.pdf]

## Semi-structured Key Informant data collection guide

---

Research Title: “Climate Change and Maternal, Reproductive and Child Health Outcomes in Tanzania: Evidence from Qualitative Study in Kilwa District, Lindi Region”

---

### GUIDING QUESTIONS:

1. What do you understand by the term climate change?  
Probe:
  - a) Do you perceive climate change as a serious threat to public health? Why?
  - b) What changes in weather/climate have you noticed happening in Kilwa District Council in recent years? (*Recurring floods, droughts, tropical cyclones, rise in temperature, sea level rise, prolonged dry spells, unpredictable rainfall, etc.*)
  - c) Which of those weather/climate changes occur more frequently or more severely compared with the past years?
  - d) Who are the most vulnerable groups to the climate-related health risks in your area? And why?
2. How does climate variability such as *floods, droughts, heatwaves*, etc., affect maternal, reproductive, and child health in your community?  
Probe on the following:
  - a) What are the common climate-sensitive diseases that affect pregnant women and children in your area?
  - b) How does climate-induced food insecurity impact maternal and child nutrition status in your area?
  - c) How does climate variability affect access and/delivery of essential healthcare services in your area?
    - i. What are the most likely impacts of compromised healthcare services delivery?
    - ii. Please describe any event/scenario on the consequences of compromised healthcare service delivery during climate-related disasters.
3. What are the existing adaptation measures/coping strategies that you implement in response to climate change?
  - a) How does your healthcare facility ensure minimal disruption in the provision of healthcare services during climate-related disasters such as floods?
  - b) Please describe your experience with healthcare service delivery during the latest flooding events in the Kilwa district.
  - c) Are the adaptation measures effective in addressing climate-related health risks? Why?
4. Is there anything you would like to add that has not been covered in this discussion?
